1                   An evolutionary resolution of manipulation conflict

2                                   Mauricio González-Forero

3                                   Tuesday 18<sup>th</sup> March, 2014

4 Department of Ecology and Evolutionary Biology, University of Tennessee, Knoxville, TN, USA

5 National Institute for Mathematical and Biological Synthesis (NIMBioS)

6 [mgonzal7@utk.edu](mailto:mgonzal7@utk.edu)

7  
8 Keywords: Arms race, altruism, cooperation, social behavior.

9 Running title: Evolutionary resolution of manipulation conflict.

10  
11 # of words: 6,884.

12 # of tables: 0.

13 # of figures: 6.

14 Present address:

15 Department of Ecology and Evolution, University of Lausanne, Switzerland

16

## Abstract

17

Individuals can manipulate the behavior of social partners. However, manipulation may conflict with the fitness interests of the manipulated individuals. Manipulated individuals can then be favored to resist manipulation, possibly reducing or eliminating the manipulated behavior in the long run. I use a mathematical model to show that conflicts where manipulation and resistance coevolve can disappear as a result of the coevolutionary process. I find that while manipulated individuals are selected to resist, they can simultaneously be favored to express the manipulated behavior at higher efficiency (i.e., providing increasing fitness effects to recipients of the manipulated behavior). Efficiency can increase to a point at which selection for resistance disappears. This process yields an efficient social behavior that is induced by social partners, and over which the inducing and induced individuals are no longer in conflict. A necessary factor is costly inefficiency. I develop the model to address the evolution of advanced eusociality via maternal manipulation (AEMM). The model predicts AEMM to be particularly likely in taxa with ancestrally imperfect resistance to maternal manipulation. Costly inefficiency occurs if the cost of delayed dispersal is larger than the benefit of exploiting the maternal patch. I discuss broader implications of the process.

31

## 32 **Introduction**

33 In some taxa, individuals can control partially or completely the behavior of other individuals, an action  
34 referred to as manipulation (Alexander, 1974, Dawkins, 1978). For example, baculoviruses manipulate  
35 their host, a moth caterpillar, to climb trees; the caterpillars then die and liquefy at the tree top causing  
36 a “virus rain” in the foliage below, thereby facilitating infection of new hosts (Hoover *et al.*, 2011).

37 Workers in social insects can induce their siblings to develop as workers or queens by adjusting their  
38 siblings’ nutrition (Wheeler, 1986, O’Donnell, 1998). *Drosophila* males manipulate their sexual partners  
39 by transferring seminal proteins during mating (Wolfner, 2002). Manipulation is facilitated when an  
40 individual has direct access to another individual’s physiology, as is the case for internal parasites  
41 (Hughes *et al.*, 2012, Adamo and Webster, 2013), for parents and offspring (Haig, 1993), and for mating  
42 partners (Arnqvist and Rowe, 2005). In the absence of direct access to another individual’s physiology,  
43 an individual may manipulate another one through coercion, sensory exploitation, deception, and  
44 self-deception. In particular, dominant individuals may coerce subordinates into helping roles  
45 (Clutton-Brock and Parker, 1995), males may stimulate females’ pre-existing preferences to induce  
46 mating (Holland and Rice, 1998), and humans may deceive themselves to fool social partners into  
47 behaving in a given fashion (Trivers, 2011).

48 Manipulation can give rise to unlikely behaviors because the costs of expressing the behaviors are  
49 not paid by the manipulators, but by the subjects of manipulation (or “subjects” for short). As a result,  
50 costly behaviors can evolve under less stringent conditions (i.e., smaller benefit-cost ratios) than if the  
51 behaviors were performed spontaneously; that is, without manipulation (Alexander, 1974, Trivers, 1974,  
52 Charlesworth, 1978). However, costly behaviors diminish the reproductive success of the subjects.  
53 Resistance to manipulation is then favored if resistance is less expensive than accepting manipulation  
54 (Pagel *et al.*, 1998). Manipulators and subjects can thus disagree in their preferred expression level of  
55 the manipulated behavior, which constitutes an evolutionary conflict (Trivers, 1974).

56 Evolutionary conflicts can have diverse results. Mathematical theory indicates that a manipulation  
57 conflict can yield at least four possible outcomes. First, the complete victory of resistance where the  
58 manipulated behavior is eliminated. Second, the complete victory of manipulation where the  
59 manipulated behavior is fully maintained. Third, an intermediate behavior between the favored  
60 outcomes of the two parties. And fourth, perpetual cycles between high and low manipulation and  
61 resistance (e.g., Parker and Macnair, 1979, Robert *et al.*, 1999, Gavrilets *et al.*, 2001). Which outcome is  
62 reached depends on the magnitude and nature of the costs paid by each party (Godfray, 1995,  
63 Clutton-Brock, 1998, Uller and Pen, 2011), the initial conditions, and the relative genetic variances of  
64 manipulation and resistance (Gavrilets, 2000, Gavrilets and Hayashi, 2006).

65 As the evolution of manipulation and resistance proceeds, the nature of the conflict can change. In  
66 particular, the costs and benefits of the manipulated behavior can evolve if they have a genetic basis  
67 (Charlesworth, 1978, Worden and Levin, 2007, Akçay and Roughgarden, 2011). A genetic basis for the  
68 costs and benefits of a manipulated behavior is possible because they depend on the extent with which  
69 the manipulated behavior is expressed, which can be controlled by manipulators and subjects of  
70 manipulation. The evolution of costs and benefits could then increase or decrease the level of conflict.  
71 As a result, the outcome of a conflict can be substantially different from what it would be if costs and  
72 benefits are taken as constants. Here I ask what the evolution of fitness payoffs can do to the outcome of  
73 a manipulation conflict.

74 I show that the manipulation conflict can disappear as a result of the evolution of payoffs released by  
75 manipulation. This conflict resolution brings the interests of the subjects of manipulation to match  
76 those of the manipulator. The reason is that manipulation not only favors the evolution of resistance,  
77 but also the evolution of the efficiency with which the manipulated behavior is performed. If the  
78 efficiency of the manipulated behavior becomes sufficiently high, resistance to manipulation becomes  
79 disfavored. Because the conflict is eliminated, I refer to the resulting behavior as being induced rather

80 than manipulated. The result is an efficient induced behavior over which inducing and induced  
81 partners do not conflict. To show this, I develop a mathematical model of maternal manipulation where  
82 offspring are manipulated to stay in the maternal patch. As offspring evolve resistance to manipulation,  
83 they also become efficient helpers giving large fitness benefits to siblings. The outcome is offspring that  
84 are 1) maternally induced to stay in the maternal patch, 2) that are efficient helpers, and 3) that are not  
85 in conflict with their mother over their helping role. These three items match defining features of  
86 advanced eusociality, where workers are maternally induced into worker roles, can be highly  
87 specialized to perform tasks, and show relatively little conflict over their helping role (Wilson, 1971,  
88 Michener, 1974, Sherman *et al.*, 1991, Crespi and Yanega, 1995, Hölldobler and Wilson, 2009, Bignell  
89 *et al.*, 2011). The model predicts that advanced eusociality arising from this process requires ancestrally  
90 imperfect resistance probability and ancestral inefficiency costs.

## 91 **Model**

92 Consider a finite population of sexual individuals with deterministic reproduction, so genetic drift is  
93 ignored. The genetic system can be diploid or haplodiploid. The population is distributed in an area of  
94 a fixed size which is subdivided into patches, all of approximately the same size. In each patch, one  
95 singly mated female and possibly her mating partner gather resources for reproduction. The amount of  
96 resources they gather is proportional to the patch size. The mated female produces offspring, the  
97 number of which is proportional to the amount of resources gathered. So offspring number is  
98 proportional to the patch size. The average patch size decreases as the population increases, and  
99 increases as the population decreases. Hence, the population size remains constant.

100 The mother produces offspring in two subsequent broods. The first brood reaches adulthood while  
101 the second brood is not yet mature. The mother and possibly the father provide parental care to both  
102 broods. Once the second brood reaches adulthood, the parents die. After each brood reaches

103 adulthood, the brood disperses from the maternal patch to a common mating pool. All individuals in  
104 the mating pool mate once and randomly. Then, each mated female colonizes a random patch, possibly  
105 together with her mating partner, and the cycle starts anew. Competition for patch size is thus global.

106 Maternal manipulation and offspring resistance are allowed to occur. A focal mother manipulates  
107 offspring by attempting to delay the dispersal of the first brood with probability  $p_m$ , so that first-brood  
108 offspring stay in the maternal patch for a fraction of their adulthood. I make the simplifying assumption  
109 that the mother manipulates both sexes equally. A manipulated first-brood individual resists with  
110 probability  $q_1$  and leaves the maternal patch without delay. Alternatively, a manipulated first-brood  
111 individual acquiesces (i.e., does not resist) with probability  $1 - q_1$  and stays in the maternal patch for  
112 some portion of its adulthood. An acquiescing (i.e., delayed) individual expresses parental care with  
113 probability  $y_1$  while in the maternal patch. I also make the simplifying assumption that the probability  
114 of expressing parental care is equal for acquiescing individuals of either sex. This alloparental care is  
115 directed randomly to the available brood (i.e., the second one). I refer to  $y_1$  as helping efficiency. I  
116 assume manipulation  $p_m$ , resistance  $q_1$ , and helping efficiency  $y_1$  to be uncorrelated quantitative  
117 genetic traits. The population average values of manipulation, resistance, and helping efficiency are  $p$ ,  
118  $q$ , and  $y$  respectively. The three decisions individuals can make are illustrated in Fig. 1.

119 Manipulation is assumed to be executed in a way that does not affect the condition of the subjects of  
120 manipulation, and that does not affect the ability of the mother to produce the second brood. Thus, I  
121 assume both resistance and manipulation to be costless. These assumptions may hold for instance if  
122 manipulation is done via cheap pheromones that first-brood individuals can block with little direct  
123 fitness costs. The assumptions of costless manipulation and resistance lead to a simpler model, and  
124 highlight that the evolution of acquiescence does not require resistance costs (for an evaluation of the  
125 effect of resistance and manipulation costs on the evolution of manipulated behaviors, see  
126 González-Forero and Gavrilets (2013)). However, manipulation affects the ability of acquiescing

127 individuals to become parents themselves. First, regardless of whether an acquiescing individual helps,  
128 this individual has a reduced probability of becoming a parent if delayed dispersal translates into  
129 missed reproductive opportunities or less time to start a new nest. Second, if an acquiescing individual  
130 helps, a reduced probability of becoming a parent arises if by helping, the individual spends energy  
131 necessary for its own dispersal and reproduction. In contrast, if an acquiescing individual does not  
132 help, it can exploit the resources of the maternal patch for its own benefit, thereby increasing its  
133 potential to become a parent itself.

These fitness payoffs are modeled as follows. The reduction in the probability that a delayed individual becomes a parent, independently of whether the delayed individual helps, is denoted by  $c_d$ . The additional reduction in the probability that a delayed individual becomes a parent due to helping is  $c_h$ . On the other hand, the increase in the probability of becoming a parent due to the exploitation of the maternal patch while not helping is  $b_e$ . For simplicity, I ignore any frequency dependence in the payoffs  $c_d$ ,  $c_h$ , and  $b_e$ , and I treat them as constant. The total cost of acquiescence for a focal delayed first-brood individual is thus equal to

$$c = c_d + y_1 c_h - (1 - y_1) b_e \quad (1a)$$

$$= c_{\text{eff}} y_1 + c_{\text{ineff}} (1 - y_1), \quad (1b)$$

where the cost of efficiency and inefficiency are defined as

$$c_{\text{eff}} = c_d + c_h \quad (2a)$$

$$c_{\text{ineff}} = c_d - b_e. \quad (2b)$$

134 In this paper, I report the behavior of the model when there is a cost of inefficiency ( $c_{\text{ineff}} > 0$ ), so I  
135 assume throughout that the cost of delayed dispersal is greater than the benefit of exploiting the  
136 maternal patch ( $c_d > b_e$ ).

137 It remains to account for the fitness effects of manipulation on the second brood. A delayed

138 first-brood individual that helps increases the survival of recipient second-brood offspring. The  
139 increase in survival received by a random second-brood recipient is

$$b = b_{\max} Y, \quad (3)$$

140 where  $Y$  is the average helping probability among delayed individuals in the patch, and  $b_{\max}$  is the  
141 benefit a recipient of help gets when all delayed individuals in the patch help at their maximum  
142 efficiency. Denoting by  $s_0$  the baseline probability of becoming a parent (i.e., the probability that  
143 offspring become parents when manipulation does not occur), I let  $b_{\max} = 1 - s_0$ .

144 I follow the methods of Taylor and Frank (1996) and Frank (1997) to obtain dynamic equations for  
145 the coevolution of manipulation  $p$ , resistance  $q$ , and helping efficiency  $y$  (see Appendix). At any given  
146 time the population is divided into three classes of individuals: mothers, first-brood individuals, and  
147 second-brood individuals. This treatment yields three regression relatednesses that affect the  
148 evolutionary dynamics: the relatedness  $\rho_{21}$  of first-brood offspring toward second-brood offspring, and  
149 those of the mother toward the first and second brood ( $\rho_{1m}$  and  $\rho_{2m}$  respectively). For class-structured  
150 populations, the direction of evolutionary change usually depends on regression relatedness weighted  
151 by the individual reproductive value of the recipient over that of actor, which is called life-for-life  
152 relatedness (Hamilton, 1972, Bulmer, 1994). However, here the direction of evolutionary change is  
153 found to be determined by regression relatednesses weighted by equilibrium class frequencies rather  
154 than by individual reproductive values. The weighting by class equilibrium frequencies arises because  
155 the evolving traits affect survival rather than fertility. Thus, the dynamics are in terms of the equilibrium  
156 relatednesses  $r_{ji}$  of actor  $i$  toward recipient  $j$ , which are defined as  $r_{ji} = \rho_{ji} u_j / u_i$ . The quantities  $u_i$   
157 and  $u_j$  are the equilibrium frequency of individuals of class  $i$  and  $j$  respectively. For simplicity, I drop  
158 the subscripts for the relatedness of first-brood offspring toward second-brood offspring and write  
159  $\rho = \rho_{21}$ , and  $r = r_{21}$ .



## 160 **Results**

### 161 **Numerical illustration**

162 The coevolution of manipulation, resistance, and helping efficiency can change the direction of  
163 selection for resistance. For illustration, suppose that the population is diploid. Thus, with the  
164 assumptions stated in the model section, the regression relatednesses of mother-to-offspring and of  
165 first- to second-brood offspring are  $\rho_{1m} = \rho_{2m} = \rho = 1/2$  (Bulmer, 1994, Roze and Rousset, 2004).  
166 Numerical solutions for manipulation  $p$ , resistance  $q$ , and helping efficiency  $y$  from the dynamic  
167 equations (19) are shown in Fig. 2. Both maternal manipulation and offspring resistance are favored at  
168 the start of the process in Fig. 2. In Fig. 2A there is no genetic variation for helping efficiency, which  
169 then cannot evolve. In this case, resistance eliminates the manipulated behavior and all first-brood  
170 offspring disperse upon reaching adulthood (i.e., the attained equilibrium is  $p^*(1 - q^*) = 0$ ). In Fig. 2B  
171 genetic variation for helping efficiency is present. In this case, helping efficiency increases over time  
172 although individuals are initially disfavored to stay in the maternal patch. After around thirty thousand  
173 generations, helping efficiency becomes high enough that first-brood individuals become favored to  
174 stay in the maternal patch. The outcome is that mothers cause all first-brood individuals to stay,  
175 first-brood individuals acquiesce, and help at their maximum efficiency.

176 This coevolutionary process eliminates the mother-offspring conflict over offspring dispersal.  
177 Throughout the process, the mother's inclusive fitness through maternal manipulation is maximized at  
178 zero offspring resistance (Fig. 3A). In contrast, first-brood offspring's inclusive fitness through  
179 resistance is initially maximized at full resistance, but the slope of their inclusive fitness gradually  
180 changes from positive to negative (Fig. 3B). The change in slope of offspring's inclusive fitness through  
181 resistance renders this inclusive fitness maximized at zero resistance, thereby eliminating the  
182 mother-offspring conflict (Fig. 3C). Because of the lack of conflict, I refer to the final maternally

183 triggered behavior as being induced rather than being manipulated.

#### 184 **Evolutionary change in each trait**

The population-average manipulation  $p$ , resistance  $q$ , and helping efficiency  $y$  increase respectively (see eqs. (19) in the Appendix) when

$$br_{2m} > cr_{1m} \quad (4a)$$

$$br > c \quad (4b)$$

$$br > c - c_{\text{ineff}}. \quad (4c)$$

185 Manipulation, acquiescence, and helping efficiency are each favored when their respective inclusive  
186 fitness effect is positive (conditions (4)). Manipulation conflict occurs when manipulation is favored  
187 but acquiescence is not (i.e., when ineq. (4a) is met but ineq. (4b) is not). In that case, mothers attempt  
188 to delay first-brood offspring in the maternal patch against the latter's inclusive fitness interests.  
189 Offspring can rebel against manipulation by either resisting (i.e., dispersing from the maternal patch) or  
190 by refusing to help. The conditions for the evolution of these two forms of rebellion are different if the  
191 cost of inefficiency  $c_{\text{ineff}}$  is not zero (see ineqs. (4b) and (4c)). The different conditions for the evolution  
192 of acquiescence and helping efficiency can cause conflicting selection within first-brood offspring.  
193 Thus, helping efficiency may evolve even though acquiescence is not favored.

194 Conditions (4) do not specify the conditions for conflict resolution because the benefit  $b$  and cost  $c$   
195 evolve as helping efficiency  $y$  changes. Consequently, whether or not conditions (4) are met varies with  
196 the evolution of helping efficiency. In order to determine the conditions for conflict resolution, a  
197 dynamic analysis is necessary (see §2 in the online Supporting Information (SI)).

198 **Conditions for conflict resolution**

199 The system evolves either to a state where manipulation disappears ( $p^* = 0$ ), to a state where resistance  
200 is complete ( $q^* = 1$ ), or to induced behavior where manipulation, acquiescence, and helping efficiency  
201 are established  $[(p^*, q^*, y^*) = (1, 0, 1)]$ .

202 The evolution of induced behavior requires two conditions regarding resistance. First, acquiescence  
203 must be favored when first-brood offspring help at their maximum efficiency, which occurs if

$$b_{\max}r > c_{\text{eff}}. \quad (5)$$

When condition (5) holds, the coevolutionary dynamics of resistance  $q$  and helping efficiency  $y$  are as described in Fig. 4A. Acquiescence can be disfavored at the start of the process, and the evolution of helping efficiency can render acquiescence favored if the population starts in the dark gray area in Fig. 4A. The population starts in either the gray or dark gray area in Fig. 4A if the next condition is met. Second, induced behavior requires that the probability of resistance is initially small enough, which occurs if

$$b_0r + (1 - q_0)S\sqrt{\frac{V_y}{V_q}} > c_0, \quad (6a)$$

204 where

$$S = b_{\max}r - (c_{\text{eff}} - c_{\text{ineff}}). \quad (6b)$$

205 The variables with subscript “0” refer to the value of the variable at the initial time. The quantity  $S$   
206 measures selection for helping efficiency, which is positive when condition (5) holds.  $V_q$  and  $V_y$  are the  
207 additive genetic variances for resistance and helping efficiency respectively.

208 Condition (6a) is related to Hamilton’s rule (Hamilton, 1964, 1970). Hamilton’s rule states that  
209 acquiescence is favored at the initial time if  $b_0r > c_0$  (from ineq. (4b)). The additional term in condition  
210 (6a) measures the speed of increase in helping efficiency relative to that of resistance ( $S\sqrt{V_y/V_q}$ ) and

211 the opportunity that helping efficiency has to render acquiescence favored ( $1 - q_0$ ). Because this  
212 additional term is positive when ineq. (5) holds, condition (6a) requires less stringent conditions  
213 (smaller  $b/c$  ratios) to be met than those required for acquiescence to be favored at the initial time  
214 ( $b_0 r > c_0$ ). Condition (6a) may then be seen as defining a relaxed Hamilton's rule, which rather than  
215 giving the direction of selection specifies when acquiescence can be obtained in the long run.

216 The evolution of induced behavior also requires two conditions regarding manipulation. First,  
217 manipulation must be favored when first-brood offspring help at their maximum efficiency (ineq.  
218 (S25a) in the SI). Second, the evolution of helping efficiency must be able to render manipulation  
219 favored (ineq. (S25c) in the SI). If the probability of manipulation is initially small, the second condition  
220 regarding manipulation simply states that manipulation must be favored initially.

Four conditions are then necessary and sufficient for induced behavior (ineqs. (S25) in the SI). If  
manipulation  $p$  and resistance  $q$  are initially small, induced behavior  $(p^*, q^*, y^*) = (1, 0, 1)$  evolves if all  
the following conditions hold:

$$b_{\max} r_{2m} > c_{\text{eff}} r_{1m} \quad (7a)$$

$$b_{\max} r > c_{\text{eff}} \quad (7b)$$

$$b_0 r_{2m} > c_0 r_{1m} \quad (7c)$$

$$b_0 r + S \sqrt{V_y / V_q} > c_0. \quad (7d)$$

221 Conditions (7a) and (7b) respectively state that both manipulation and acquiescence must be favored  
222 when helping efficiency is maximal; condition (7c) states that manipulation must be initially favored;  
223 and condition (7d) guarantees that acquiescence becomes favored as the population evolves.

224 The evolutionary resolution of manipulation conflict occurs when induced behavior is obtained and  
225 acquiescence is not initially favored (i.e., conditions (7) are met but condition (4b) is not met initially).

226 The region of parameter space in which the conflict is resolved is narrow (black regions in Fig. 5).

227 However, the region for conflict resolution can be wider than the region in which first-brood offspring  
228 are favored to stay from the beginning of the process (i.e., non-conflicting acquiescence; dark gray  
229 regions in Fig. 5). In this simple model, where the mother equally manipulates both sexes, both sexes  
230 are equally efficient, and the sex ratio is equal in both broods, the region of conflict resolution can be  
231 the same for both diploids and haplodiploids (Fig. 5).

## 232 **Spontaneous behavior**

233 The evolution of helping efficiency could render spontaneous (i.e., unmanipulated) helping favored just  
234 as it does for induced behavior. In §1 of the SI, I build an analogous model in which the probability  $x_1$   
235 that a first-brood individual stays in the maternal patch is fully under control of the staying individual.  
236 A spontaneously staying first-brood individual expresses alloparental care toward the second brood  
237 with probability  $y_1$ . The population averages of the spontaneous behavior and helping efficiency are  $x$   
238 and  $y$  respectively.

239 The coevolutionary dynamics of the spontaneous behavior  $x$  and helping efficiency  $y$  are a mirror  
240 image of those of resistance  $q$  and helping efficiency  $y$  (Fig. 4B). As a result, if staying spontaneously is  
241 initially disfavored, the evolution of helping efficiency can render it favored. Two conditions must be  
242 satisfied for efficient spontaneous behavior to be obtained  $[(x^*, y^*) = (1, 1)]$ . First, spontaneous  
243 behavior must be favored when helping efficiency is maximal (same condition (5) as for acquiescence).  
244 Second, the probability of staying spontaneously must be initially *large* enough (condition (6a) after  
245 changing  $1 - q_0$  for  $x_0$  and  $V_q$  for the additive genetic variance for staying spontaneously  $V_x$ ). Hence, the  
246 opportunity for helping efficiency to render spontaneous behavior favored is  $x_0$ . If the initial probability  
247  $x_0$  of staying spontaneously is small (as is expected to be the case for altruistic traits), then the second  
248 condition for efficient spontaneous behavior simply requires that the spontaneous behavior is favored  
249 at the initial time. Hence, if the ancestral probability of spontaneously staying is small, the evolution of

250 helping efficiency cannot not render the spontaneous behavior favored if it is not favored initially.

251 Consequently, induced behavior  $(p^*, q^*, y^*) = (1, 0, 1)$  can be obtained under less stringent  
252 conditions (smaller initial  $b/c$  ratios) than spontaneous behavior  $(x^*, y^*) = (1, 1)$ . In particular, suppose  
253 that the initial benefit  $b_0$  and cost  $c_0$  are the same under manipulated and spontaneous behavior.  
254 Assume also that the relatedness  $r$  of first- to second brood is the same under manipulated and  
255 spontaneous behavior. Then, if manipulation, resistance, and staying spontaneously are all initially  
256 unlikely (i.e.,  $p_0, q_0, x_0 \approx 0$ ), induced behavior can be obtained (condition (7d) is met) while  
257 spontaneous behavior is not obtained ( $b_0 r < c_0$ ) if

$$0 < c_0 - b_0 r < S \sqrt{\frac{V_y}{V_q}}. \quad (8)$$

258 Condition (8) specifies when induced behavior can be expected but spontaneous behavior fails to  
259 evolve. This condition summarizes that the evolution of helping efficiency allows induced behavior to  
260 require less stringent conditions than spontaneous behavior since condition (8) cannot be satisfied if  
261 helping efficiency cannot evolve (i.e., if  $SV_y = 0$ ).

262 Because induced and spontaneous behavior can evolve under different conditions, predictions may  
263 be derived to test whether or not advanced eusociality in a given taxon is the result of manipulation.

## 264 **Discerning whether advanced eusociality stems from manipulation**

265 The ancestral conditions give a distinction between induced and spontaneous behavior. Induced  
266 behavior requires ancestrally imperfect resistance probability (black line in Fig. 6A). Under the same  
267 ecological conditions and if the ancestral benefit  $b_0$  and the ancestral cost  $c_0$  are the same under  
268 manipulated and spontaneous behavior, spontaneous behavior requires a sufficiently large ancestral  
269 probability of staying spontaneously (dashed gray line in Fig. 6A).

270 Although it is not possible to directly determine ancestral conditions except when experimental  
271 evolution is feasible, indirect estimation of ancestral conditions may be possible. Consider an advanced

272 eusocial population A of interest. Assume there is an extant population B satisfying the following  
273 requirements. 1) The population B is not advanced eusocial; 2) it is very close phylogenetically to  
274 population A and it has not been exposed to the manipulation mechanism that could have brought  
275 population A to advanced eusociality; and 3) it has the following life-history properties: offspring are  
276 produced in two subsequent broods, first-brood individuals are maternally manipulated in a detectable  
277 way (e.g., via coercion), and some of the first-brood offspring stay as adults in the maternal patch. Then,  
278 the ancestral probability of resistance ( $q_0$ ) and of staying spontaneously ( $x_0$ ) for population A can be  
279 estimated in population B (Fig. 6B). The ancestral probability of resistance ( $q_0$ ) is given by the fraction  
280 of the manipulated first brood that leave the maternal patch (gray area on the left side of Fig. 6B). In  
281 contrast, the ancestral probability of spontaneously staying ( $x_0$ ) corresponds to the fraction of the first  
282 brood that stay without being manipulated (white area on the right side of Fig. 6B).

283 A large resistance probability in population B rejects the hypothesis that the advanced eusociality in  
284 population A arose from the resolution of a conflict caused by the manipulation mechanism evaluated  
285 in B. An imperfect resistance probability in B is consistent with advanced eusociality via resolution of  
286 manipulation conflict in A (black line in Fig. 6A). Similarly, a small probability of staying spontaneously  
287 in population B rejects the hypothesis that the advanced eusociality in population A arose because the  
288 evolution of helping efficiency rendered spontaneous behavior favored. A substantial probability of  
289 staying spontaneously in population B is consistent with advanced eusociality in A arising because the  
290 evolution of helping efficiency rendered staying spontaneously favored (dashed gray line in Fig. 6A).  
291 However, these conclusions are very difficult to draw in practice, particularly because of requirement 2)  
292 according to which the population must be naive to the manipulation mechanism evaluated.

## 293 **Discussion**

294 Manipulation allows unlikely behaviors to evolve (Dawkins, 1982, Hughes *et al.*, 2012). A puzzle with  
295 manipulation is that the evolution of resistance to manipulation can reduce or eliminate the  
296 manipulated behaviors (e.g., Parker and Macnair, 1979, Clutton-Brock and Parker, 1995, Gavrillets and  
297 Hayashi, 2006, Reuter and Keller, 2001, Kawatsu, 2013). However, the benefits and costs of the  
298 manipulated behavior can evolve if they have a genetic basis (Charlesworth, 1978, Worden and Levin,  
299 2007, Akçay and Roughgarden, 2011). Benefits and costs of a manipulated behavior can have a genetic  
300 basis since they depend on the extent with which the manipulated behavior is expressed. Yet, how the  
301 evolution of payoffs can affect the nature and outcome of the conflict is not known. I have shown that  
302 the manipulation conflict can disappear as a result of the evolution of payoffs released by manipulation.  
303 The reason is that manipulation can simultaneously favor resistance and the efficiency with which the  
304 manipulated behavior is expressed. Since the conflict disappears, I refer to the resulting behavior as  
305 being induced rather than as being manipulated. The resolution of conflict has implications for our  
306 understanding of the evolution of advanced eusociality in particular, and for the evolution of  
307 manipulated behavior in general.

### 308 **Ancestrally imperfect resistance and costly inefficiency allow for conflict resolution**

309 The conflict can be eliminated if two key factors occur. First, inefficiency at expressing the manipulated  
310 behavior must be costly ( $c_{\text{ineff}} > 0$ ). When manipulated, an individual has two options for rebelling: it  
311 can either refrain from performing the manipulated behavior (i.e., referred to as resistance), or it can  
312 perform the behavior inefficiently. The evolution of these two forms of rebellion can be decoupled  
313 because one can be costlier than the other. For simplicity, I have assumed that resistance is costless,  
314 and have focused on the effect of costly inefficiency. Inefficiency is costly if the cost of being delayed in  
315 the maternal patch is larger than the benefit of exploiting the maternal patch ( $c_d > b_e$ ). That is,



316 inefficiency is costly if the fraction of reproductive opportunities missed by having delayed dispersal is  
317 greater than the increased probability to reproduce due to exploiting the maternal patch. If inefficiency  
318 is costly, then helping efficiency can increase even if resistance is also favored (compare conditions (4b)  
319 and (4c)). Acquiescence becomes favored if helping efficiency becomes large enough. Once  
320 acquiescence is favored, the conflict disappears. After the conflict is resolved, both inducing and  
321 induced individuals favor the induced behavior, even if the cost of inefficiency disappears.

322       Second, for the conflict to be eliminated, resistance must be initially imperfect. I have assumed that  
323 the manipulated behavior is performed entirely by the subjects of manipulation. So, if they resist with  
324 full probability, no manipulated behavior is expressed regardless of how hard manipulators try. In  
325 consequence, acquiescence can only be obtained if the probability of resistance is ancestrally imperfect  
326 (González-Forero and Gavrilets, 2013). Ancestrally imperfect resistance allows induced behavior to be  
327 obtained under more lax conditions than spontaneous behavior. The reason stems from the  
328 observation that the evolution of helping efficiency can render both acquiescence and spontaneous  
329 behavior favored if they are already present ancestrally. Spontaneous behavior is unlikely to be present  
330 ancestrally because it is selected against before ecological conditions make it favorable. In contrast,  
331 acquiescence is more likely to be present ancestrally because of the absence of selection for resistance  
332 before manipulation arises.

333       Acquiescence is likely to be present ancestrally depending on how manipulation is executed. Before  
334 manipulation starts evolving, there is no initial selection pressure for resistance. Hence, if manipulation  
335 is ancestrally executed in a way that subjects of manipulation have not evolved the means to detect,  
336 ancestrally imperfect resistance can be expected. Subtle forms of manipulation can then be particularly  
337 likely to yield induced behavior.

### 338 **Major transitions via conflict resolution**

339 The outcome of conflict resolution is consistent with requirements for a major evolutionary transition  
340 in general and for advanced eusociality in particular. Major evolutionary transitions involve the  
341 evolution of high levels of cooperation and low levels of conflict (Queller and Strassmann, 2009).  
342 Conflict resolution yields here an efficient helping behavior that is induced by the mother and over  
343 which there is no conflict between inducing and induced individuals. The high helping efficiency  
344 corresponds to high levels of cooperation, while the elimination of conflict produces the required low  
345 levels of conflict, thereby fulfilling these requirements for a major transition. On the other hand,  
346 advanced eusociality involves 1) maternally induced workers, 2) high levels of specialization of workers  
347 and reproductives, and 3) relatively minor conflict in workers regarding their helping role (Wilson, 1971,  
348 Michener, 1974, Sherman *et al.*, 1991, Crespi and Yanega, 1995, Hölldobler and Wilson, 2009, Bignell  
349 *et al.*, 2011). Maternal manipulation results in 1) maternally induced helping, 2) high helping efficiency,  
350 and 3) elimination of conflict between inducing and induced individuals, which directly relate to each  
351 of the three mentioned characteristics of advanced eusociality. However, the high maternal fertility  
352 observed in the specialization of reproductives is not a consequence of the present model (Figs. S5 and  
353 S6 in the SI).

354 Conflict resolution reinterprets the role of parental manipulation in advanced eusociality. The  
355 hypothesis of eusociality via parental manipulation indicates that offspring evolve helping behaviors  
356 because of parental influence (Alexander, 1974). Parental manipulation is thought to be relevant for  
357 primitive eusociality where the small colony sizes allow the mother to coerce offspring into helping  
358 (West, 1967, Michener and Brothers, 1974, Brand and Chapuisat, 2012). However, whether or not  
359 parental manipulation is relevant for the evolution of advanced eusociality is less clear, because the  
360 large colony sizes would make it impracticable for the mother to coerce offspring into helping (Keller  
361 and Nonacs, 1993).

362 There are at least two kinds of predictions available to assess whether or not parental manipulation  
363 occurs in advanced eusocial taxa. A first kind of prediction assumes that the manipulation conflict  
364 results in arms races. Predictions of the first kind indicate that the manipulation mechanism (e.g.,  
365 queen pheromones, and cuticular hydrocarbons) should evolve fast, be highly divergent among species  
366 (Brunner *et al.*, 2011), and should not honestly signal the queen's condition (Keller and Nonacs, 1993). A  
367 second kind of prediction assumes that there is a single winner of the manipulation conflict.  
368 Predictions of the second kind indicate that if the mother wins the conflict, the maternal preference is  
369 satisfied and the fraction of rebellious workers (e.g., those activating their ovaries) should be  
370 independent of sister-sister relatedness because the mother is equally related to her female offspring. In  
371 contrast, if offspring win the conflict, the offspring preference is satisfied and the fraction of rebellious  
372 workers should covary with sister-sister relatedness (Wenseleers *et al.*, 2004, van Zweden *et al.*, 2013).  
373 The empirical evidence has not been conclusive, but parental manipulation is only weakly supported in  
374 some species (Heinze and d'Ettorre, 2009, Brunner *et al.*, 2011, van Zweden *et al.*, 2013).

375 The assumptions of the available predictions for testing whether or not parental manipulation  
376 occurs in advanced eusociality do not apply if the manipulation conflict is eliminated. After the conflict  
377 disappears, evolutionary arms races between inducing and induced individuals are not expected.  
378 Instead, the mother and offspring agree on the offspring's helping role, and should thereafter coevolve  
379 in a mutualistic manner. In addition, after the conflict disappears, there is not a single winner of the  
380 conflict in the sense of whose preferred outcome is more satisfied, because in this sense both parties  
381 win. The resolution of conflict aligns the fitness interests of mother and offspring and both attain their  
382 maximum inclusive fitness for their current circumstances. The fraction of rebelling workers after the  
383 manipulation conflict is resolved may thus covary with sister-sister relatedness since workers are still  
384 able to pursue their own inclusive fitness interests. In addition, large colony sizes are compatible with  
385 ancestral manipulation because after the conflict is resolved the mother need not coerce offspring into

386 helping. However, conflict may arise again if the mother evolves multiple mating as it may increase her  
387 productivity (Mattila and Seeley, 2007). Finally, the prediction that manipulation mechanisms should  
388 not constitute honest signals is not expected after conflict resolution since it is possible that ancestral  
389 manipulation is co-opted into honest signaling after the conflict is eliminated (see below).

### 390 **Manipulation could either be lost or be co-opted as communication after conflict resolution**

391 Conflict resolution could either eliminate selection for manipulation or it could co-opt manipulation  
392 into communication. After conflict resolution, manipulation may become disfavored. Since induced  
393 individuals are now favored to express the induced behavior, they may be selected to express it even if  
394 manipulation is not present. Suppose that first-brood individuals receive environmental cues (e.g.,  
395 temperature or humidity) that inform them that they belong to the first brood rather than to the second  
396 one. In that case, manipulation becomes unnecessary and first-brood offspring develop as workers  
397 following environmental cues. Hence, manipulation could decrease and disappear. Even in the absence  
398 of manipulation, the behavior is maintained since the attained helping efficiency renders the behavior  
399 favored by selection. However, the behavior is not socially induced anymore, and it becomes  
400 environmentally induced instead.

401 Alternatively, manipulation may continue to be favored after the conflict is eliminated. Now suppose  
402 that first brood individuals receive no reliable cues to inform them of the brood they belong to. If  
403 manipulation is reduced, helpers may develop in the second brood. Since second-brood helpers do not  
404 have recipients of their help, the possibility of second-brood helpers makes manipulation still favored  
405 in order to prevent second brood helpers. Manipulation is then maintained after the conflict  
406 disappears. In this case, manipulation is maintained to inform first-brood offspring about the brood  
407 they belong to. Manipulation is thus co-opted as communication.

408 The co-option of manipulation as communication also suggests a hypothesis for the evolution of

409 royal jelly in honey bees. In honey bees, royal jelly is given to individuals which induces them to develop  
410 into reproductives. That is, individuals are induced to become reproductive rather than workers. The  
411 existence of royal jelly is puzzling because individuals should attempt to become reproductive by  
412 default. Indeed, it is further puzzling that royal jelly enhances the reproductive abilities of *Drosophila*  
413 females (Kamakura, 2011). Why are not these enhanced reproductive abilities in *Drosophila* females  
414 present in nature? If manipulation informs offspring about the brood they are in, it may become  
415 cheaper to inform reproductives rather than workers. In particular, if the mother starts to produce more  
416 workers than reproductives, it may become less expensive to inform reproductives-to-be rather than  
417 workers-to-be because there are fewer reproductives. In such a case, induction of reproductives rather  
418 than workers would be selected. A mechanism such as royal jelly could then evolve. If reproductives  
419 become highly specialized so that they require helpers to survive, their enhanced reproductive abilities  
420 triggered by royal jelly are only of use if helpers are available. Then, the enhanced reproductive abilities  
421 in *Drosophila* females would be useless in the solitary species.

## 422 **Assessing whether a behavior stems from ancestral manipulation**

423 Two analytical conditions specify when a behavior can result from the resolution of manipulation  
424 conflict but not from spontaneous behavior. First, the ancestral resistance probability must be  
425 sufficiently small (condition (6a) is met). Second, spontaneous behavior must be ancestrally disfavored  
426 or, more generally, its ancestral probability must be sufficiently small (condition (S15b) in the SI is not  
427 met). Although ancestral conditions cannot be directly estimated except in experimental evolution,  
428 indirect estimation of ancestral conditions in extant populations may be possible (Fig. 6B). In addition,  
429 estimation of costs, benefits, and relatednesses is very difficult in practice. However, the model defines  
430 costs and benefits in a specific manner which may help address this difficulty.

431 The model presented here is deliberately simple so that complete analytical treatment is possible.

432 Enhancing its realism necessarily affects many of its properties. For example, I assumed that  
433 manipulation and resistance are costless. However, costs of manipulation and resistance that are either  
434 constant or functions of manipulation and resistance can qualitatively change the dynamics (Reuter  
435 *et al.*, 2004). When comparing induced and spontaneous behavior, I assumed that the ancestral benefit  
436  $b_0$  and the ancestral cost  $c_0$  are the same under both scenarios. Yet, the ancestral helping efficiency can  
437 be different between these scenarios because individuals may help more or less depending on whether  
438 or not and how they were manipulated. I also assumed competition to be global, so the effects of local  
439 competition in the conflict resolution remain to be elucidated. In addition, I ignored the effect of  
440 genetic drift, which can take the evolutionary trajectories out of the basin of attraction toward induced  
441 behavior. Finally, I assumed that the mother manipulates both sexes equally and that both sexes are  
442 equally efficient. Although sexually unbiased manipulation and sexually unbiased efficiency are  
443 realistic assumptions for diploid genetic systems with ancestral biparental care, they are not proper  
444 assumptions for haplodiploids where only maternal care is expected to occur ancestrally. An extension  
445 of the model to include sex-differential manipulation and sex-differential efficiency is more appropriate  
446 to assess conflict resolution in haplodiploids.

#### 447 **Conflict resolution in broader contexts**

448 Conflict resolution may similarly occur in other settings where manipulation and resistance coevolve.  
449 The model was built for a specific mother-offspring setting so that dynamic analysis is possible.  
450 However, the key factors of the process are independent of the mother-offspring setting. Manipulation,  
451 resistance, and the efficiency of the manipulated behavior are properties that occur across biological  
452 and cultural systems. The necessary factors for conflict elimination, namely ancestrally imperfect  
453 resistance and inefficiency costs, can occur widely in evolving systems as well.

454 Although the manipulation conflict in this model only resolves if the subjects of manipulation and

455 the targets of the manipulated behavior are related (in the model, the “targets” are second-brood  
456 offspring; see condition (7b)), the process is in principle not limited to family settings. The conflict may  
457 also resolve if subjects and targets are unrelated for at least three reasons. First, relatedness may be  
458 unnecessary if resistance is costlier than acquiescence (González-Forero and Gavrillets, 2013). Second,  
459 in the model, relatednesses measure the correlation in the heritable components of the traits between  
460 actors and recipients of the traits (Frank, 1998, 2013). These correlations may arise from at least six  
461 different processes, only one of which requires a family setting. Those processes are: 1) kinship (as in  
462 kin selection) (Hamilton, 1964, 1970); 2) conditional response to partner’s behavior (e.g., help only if  
463 helped; as in reciprocity) (Queller, 1985, Frank, 1994, Fletcher and Zwick, 2006); 3) biased assortment  
464 among groups (e.g., helpers being more common in some groups than in others; as in group selection)  
465 (Queller, 1985, Fletcher and Doebeli, 2009); 4) manipulation (e.g., by changing partner’s behavior to  
466 match yours); 5) punishment (e.g., by changing payoffs so that the partner changes its behavior); or 6)  
467 partner choice (e.g., by changing partner) (Queller, 2011). Third, if relatedness is negative, induced  
468 behaviors that harm the targets of the induced behavior could be obtained (which may be modeled by  
469 letting  $b_{\max} < 0$ , causing  $b < 0$ ) (González-Forero and Gavrillets, 2013).

470 The resolution of conflict as a result of the evolutionary process released by manipulation itself  
471 renders manipulation both more likely to be important in nature and more difficult to detect.  
472 Increasing the testability of manipulation becomes then a potentially rewarding challenge.

## 473 **Acknowledgments**

474 I thank Sergey Gavrillets, Laurent Lehmann, Danielle Mersch, Charles Mullon, Laurent Keller, Brian  
475 O’Meara, Jon Wilkins, Jeremy Auerbach, Kelly Rooker, Simon Powers, and three anonymous reviewers  
476 for discussion or comments on various versions of the manuscript which substantially improved its  
477 final form. I thank S. Gavrillets for suggesting a cleaner way to derive the basin of attraction toward

478 induced behavior, and for access to the Volos computer cluster in which numerical simulations  
479 conducive to the results reported here were run. Volos is funded by the NIH grant #GM-56693 to S.  
480 Gavrillets. I was funded by a Graduate Research Assistantship from the National Institute for  
481 Mathematical and Biological Synthesis (NIMBioS). NIMBioS is sponsored by the National Science  
482 Foundation, the U.S. Department of Homeland Security, and the U.S. Department of Agriculture  
483 through NSF Award #EF-0832858, with additional support from The University of Tennessee, Knoxville.

## 484 **References**

- 485 Adamo, S. A. and Webster, J. P., editors (2013). *Special issue: Neural parasitology - how parasites*  
486 *manipulate host behaviour*. *J. Exp. Biol.* 216: 1–160.
- 487 Akçay, E. and Roughgarden, J. (2011). The evolution of payoff matrices: providing incentives to  
488 cooperate. *Proc. Roy. Soc. B*, **278**, 2198–2206.
- 489 Alexander, R. D. (1974). The evolution of social behavior. *Annu. Rev. Ecol. Syst.*, **5**, 323–383.
- 490 Arnqvist, G. and Rowe, L. (2005). *Sexual Conflict*. Princeton Univ. Press.
- 491 Bignell, D. E., Roisin, Y., and Lo, N., editors (2011). *Biology of Termites*. Springer.
- 492 Brand, N. and Chapuisat, M. (2012). Born to be bee, fed to be worker? The caste system of a primitively  
493 eusocial insect. *Front. Zool.*, **9**, 35.
- 494 Brunner, E., Kroiss, J., Trindl, A., and Heinze, J. (2011). Queen pheromones in *Temnothorax* ants: control  
495 or honest signal? *BMC Evol. Biol.*, **11**, 55.
- 496 Bulmer, M. (1994). *Theoretical Evolutionary Ecology*. Sinauer.
- 497 Charlesworth, B. (1978). Some models of the evolution of altruistic behaviour between siblings. *J. Theor.*  
498 *Biol.*, **72**, 297–319.



- 499 Clutton-Brock, T. H. (1998). Reproductive skew, concessions and limited control. *Trends. Ecol. Evol.*, **13**,  
500 288–292.
- 501 Clutton-Brock, T. H. and Parker, G. A. (1995). Punishment in animal societies. *Nature*, **373**, 209–216.
- 502 Crespi, B. J. and Yanega, D. (1995). The definition of eusociality. *Behav. Ecol.*, **6**, 109–115.
- 503 Dawkins, R. (1978). Replicator selection and the extended phenotype. *Z. Tierpsychol.*, **47**, 61–76.
- 504 Dawkins, R. (1982). *The Extended Phenotype*. Oxford Univ. Press.
- 505 Fletcher, J. A. and Doebeli, M. (2009). A simple and general explanation for the evolution of altruism.  
506 *Proc. R. Soc. B*, **276**, 13–19.
- 507 Fletcher, J. A. and Zwick, M. (2006). Unifying the theories of inclusive fitness and reciprocal altruism.  
508 *Am. Nat.*, **168**, 252–262.
- 509 Frank, S. A. (1994). Genetics of mutualism: the evolution of altruism between species. *J. Theor. Biol.*,  
510 **170**, 393–400.
- 511 Frank, S. A. (1997). Multivariate analysis of correlated selection and kin selection, with an ESS  
512 maximization method. *J. Theor. Biol.*, **189**, 307–316.
- 513 Frank, S. A. (1998). *Foundations of Social Evolution*. Princeton Univ. Press.
- 514 Frank, S. A. (2013). Natural selection. VII. History and interpretation of kin selection theory. *J. Evol.*  
515 *Biol.*, **26**, 1151–1184.
- 516 Gavrillets, S. (2000). Rapid evolution of reproductive barriers driven by sexual conflict. *Nature*, **403**,  
517 886–889.
- 518 Gavrillets, S. and Hayashi, T. I. (2006). The dynamics of two- and three-way sexual conflicts over mating.  
519 *Proc. Roy. Soc. B*, **361**, 345–354.

- 520 Gavrilets, S., Arnqvist, G., and Friberg, U. (2001). The evolution of female mate choice by sexual conflict.  
521 *Proc. R. Soc. B*, **268**, 531–539.
- 522 Godfray, H. C. J. (1995). Evolutionary theory of parent-offspring conflict. *Nature*, **376**, 133–138.
- 523 González-Forero, M. and Gavrilets, S. (2013). Evolution of manipulated behavior. *Am. Nat.*, **182**,  
524 439–451.
- 525 Haig, D. (1993). Genetic conflicts in human pregnancy. *Q. Rev. Biol.*, **68**, 495–532.
- 526 Hamilton, W. D. (1964). The genetical evolution of social behaviour I. *J. Theor. Biol.*, **7**, 1–16.
- 527 Hamilton, W. D. (1970). Selfish and spiteful behavior in an evolutionary model. *Nature*, **228**, 1218–1220.
- 528 Hamilton, W. D. (1972). Altruism and related phenomena, mainly in social insects. *Annu. Rev. Ecol.*  
529 *Evol. Syst.*, **3**, 193–232.
- 530 Heinze, J. and d’Ettorre, P. (2009). Honest and dishonest communication in social Hymenoptera. *J. Exp.*  
531 *Biol.*, **212**, 1775–1779.
- 532 Holland, B. and Rice, W. R. (1998). Chase away sexual selection: antagonistic seduction versus  
533 resistance. *Evolution*, **52**, 1–7.
- 534 Hölldobler, B. and Wilson, E. O. (2009). *The Superorganism*. W. W. Norton and Company, Inc.
- 535 Hoover, K., Grove, M., Gardner, M., Hughes, D. P., McNeil, J., and Slavicek, J. (2011). A gene for an  
536 extended phenotype. *Science*, **333**, 1401.
- 537 Hughes, D. P., Brodeur, J., and Thomas, F., editors (2012). *Host Manipulation by Parasites*. Oxford Univ.  
538 Press.
- 539 Kamakura, M. (2011). Royalactin induces queen differentiation in honeybees. *Nature*, **473**, 478–483.

- 540 Kawatsu, K. (2013). Sexually antagonistic coevolution for sexual harassment can act as a barrier to  
541 further invasions by parthenogenesis. *Am. Nat.*, **181**, 223–234.
- 542 Keller, L. and Nonacs, P. (1993). The role of queen pheromones in social insects: queen control or queen  
543 signal? *Anim. Behav.*, **45**, 787–794.
- 544 Mattila, H. R. and Seeley, T. D. (2007). Genetic diversity in honey bee colonies enhances productivity  
545 and fitness. *Science*, **317**, 362–364.
- 546 Michener, C. D. (1974). *The Social Behavior of the Bees*. Belknap Press, Cambridge, MA.
- 547 Michener, C. D. and Brothers, D. J. (1974). Were workers of eusocial Hymenoptera initially altruistic or  
548 oppressed? *Proc. Natl. Acad. Sci. USA*, **71**, 671–674.
- 549 O'Donnell, S. (1998). Reproductive caste determination in eusocial wasps (Hymenoptera: Vespidae).  
550 *Annu. Rev. Entomol.*, **43**, 323–346.
- 551 Pagel, M., Møller, A. P., and Pomiankowski, A. (1998). Reduced parasitism by retaliatory cuckoos selects  
552 for hosts that rear cuckoo nestlings. *Behav. Ecol.*, **9**, 566–572.
- 553 Parker, G. A. and Macnair, M. R. (1979). Models of parent-offspring conflict. IV. Suppression:  
554 evolutionary retaliation by the parent. *Anim. Behav.*, **27**, 1210–1235.
- 555 Queller, D. C. (1985). Kinship, reciprocity and synergism in the evolution of social behaviour. *Nature*,  
556 **318**, 366–367.
- 557 Queller, D. C. (2011). Expanded social fitness and Hamilton's rule for kin, kith, and kind. *Proc. Natl.*  
558 *Acad. Sci. USA*, **108 Suppl. 2**, 10792–10799.
- 559 Queller, D. C. and Strassmann, J. E. (2009). Beyond society: the evolution of organismality. *Phil. Trans.*  
560 *R. Soc. B*, **364**, 3143–3155.

- 561 Reuter, M. and Keller, L. (2001). Sex ratio conflict and worker production in eusocial hymenoptera. *Am.*  
562 *Nat.*, **158**, 166–177.
- 563 Reuter, M., Helms, K. R., Lehmann, L., and Keller, L. (2004). Effects of brood manipulation costs on  
564 optimal sex allocation in social hymenoptera. *Am. Nat.*, **164**, E-73–E82.
- 565 Robert, M., Sorci, G., Møller, A. P., Hochberg, M. E., Pomiankowski, A., and Pagel, M. (1999). Retaliatory  
566 cuckoos and the evolution of host resistance to brood parasites. *Anim. Behav.*, **58**, 817–824.
- 567 Roze, D. and Rousset, F. (2004). The robustness of Hamilton's rule with inbreeding and dominance: kin  
568 selection and fixation probabilities under partial sib mating. *Am. Nat.*, **164**, 214–231.
- 569 Sherman, P. W., Jarvis, J., and Alexander, R. D., editors (1991). *The Biology of the Naked Mole Rat*.  
570 Princeton Univ. Press.
- 571 Taylor, P. D. (1990). Allele frequency change in a class-structured population. *Am. Nat.*, **135**, 95–106.
- 572 Taylor, P. D. and Frank, S. A. (1996). How to make a kin selection model. *J. Theor. Biol.*, **180**, 27–37.
- 573 Trivers, R. (2011). *The Folly of Fools*. Basic Books, Philadelphia, PA.
- 574 Trivers, R. L. (1974). Parent-offspring conflict. *Am. Zool.*, **14**, 249–264.
- 575 Uller, T. and Pen, I. (2011). A theoretical model of the evolution of maternal effects under  
576 parent-offspring conflict. *Evolution*, **65**, 2075–2084.
- 577 van Zweden, J. S., Bonckaert, W., Wenseleers, T., and d'Ettoire, P. (2013). Queen signaling in social  
578 wasps. *Evolution*, (doi: 10.1111/evo.12314).
- 579 Wenseleers, T., Helanterä, H., Hart, A., and Ratnieks, F. L. W. (2004). Worker reproduction and policing in  
580 insect societies: an ESS analysis. *J. Evol. Biol.*, **17**, 1035–1047.

- 581 West, M. J. (1967). Foundress associations in polistine wasps: dominance hierarchies and the evolution  
582 of social behavior. *Science*, **157**, 1584–1585.
- 583 Wheeler, D. E. (1986). Developmental and physiological determinants of caste in social Hymenoptera:  
584 evolutionary implications. *Am. Nat.*, **128**, 13–34.
- 585 Wilson, E. O. (1971). *The Insect Societies*. Harvard Univ. Press, Cambridge, MA.
- 586 Wolfner, M. F. (2002). The gifts that keep on giving: physiological functions and evolutionary dynamics  
587 of male seminal proteins in *Drosophila*. *Heredity*, **88**, 85–93.
- 588 Worden, L. and Levin, S. A. (2007). Evolutionary escape from the prisoner's dilemma. *J. Theor. Biol.*, **245**,  
589 411–422.

## 590 Appendix

### 591 Dynamic equations

592 The time is discrete. The number of individuals in class  $i$  at the current time step is  $N_i(t)$ . The number  
 593 of individuals in class  $i$  in the next time step is  $N_i(t+1)$ , which is given by the  $i$ -th entry in the column  
 594 vector  $\mathbf{N}(t+1) = \mathbf{W}\mathbf{N}(t)$ . For simplicity, fathers can be disregarded and it is enough to keep track of  
 595 mothers only. Letting the class order in the vector  $\mathbf{N}$  be mothers, first brood, and second brood, the  
 596 transition matrix is

$$\mathbf{W} = \begin{pmatrix} 0 & s_1 & s_2 \\ f_1 & 0 & 0 \\ f_2 & 0 & 0 \end{pmatrix}, \quad (9)$$

597 where  $s_k$  is the survival of  $k$ -th-brood offspring (i.e., the probability that  $k$ -th-brood offspring become  
 598 mothers) and  $f_k$  is the maternal fertility through  $k$ -th-brood offspring (i.e., the number of offspring  
 599 produced as brood  $k$ ).

For simplicity, I assume that the fraction of female offspring produced is the same in the first and second broods. Let  $\sigma$  be the fraction of offspring that are female. Because for first- and second-brood offspring to become mothers they must be female, then the survival of first-brood offspring is

$$s_1 = \sigma[p_m(1 - q_1)(s_0 - c) + p_m q_1 s_0 + (1 - p_m)s_0] \quad (10a)$$

$$= \sigma[s_0 - c p_m(1 - q_1)]. \quad (10b)$$

Let  $Q$  be the average resistance probability among manipulated first-brood offspring in the maternal patch. Then, the survival of second-brood offspring is

$$s_2 = \sigma[p_m(1 - Q)(s_0 + b) + p_m Q s_0 + (1 - p_m)s_0] \quad (11a)$$

$$= \sigma[s_0 + b p_m(1 - Q)]. \quad (11b)$$

Let  $\alpha$  be the fraction of offspring that belong to the first brood, and let  $n$  be the total number of offspring that a mother produces. Each offspring must be weighted by the genetic contribution towards it (Taylor, 1990). The genetic contribution of the mother toward offspring of sex  $i$  is  $\eta_i$  (i.e., for sexual diploids,  $\eta_i = 1/2$ ; for haplodiploids,  $\eta_{\text{♀}} = 1/2$  while  $\eta_{\text{♂}} = 1$ ). The genetic contribution of a mother to her offspring is thus on average  $\eta = \sigma\eta_{\text{♀}} + (1 - \sigma)\eta_{\text{♂}}$ . Hence, maternal fertility through first and second broods is

$$f_1 = \eta\alpha n \quad (12a)$$

$$f_2 = \eta(1 - \alpha)n. \quad (12b)$$

From eq. (29) in Taylor and Frank (1996) and eqs. (6) and (2) in Frank (1997), assuming weak selection and weak mutation, the evolutionary change in the population-average value trait value  $z$  ( $= p, q, y$ ) can be approximated by

$$\frac{dz}{dt} = V_z \sum_{ij} v_i \frac{dw_{ij}}{dg_z} u_j \Big|_{\mathbf{z}_a = \mathbf{z}} \quad (13a)$$

$$= V_z \left( v_m \frac{ds_1}{dg_z} u_1 + v_m \frac{ds_2}{dg_z} u_2 \right. \quad (13b)$$

$$\left. + v_1 \frac{df_1}{dg_z} u_m + v_2 \frac{df_2}{dg_z} u_m \right) \Big|_{\mathbf{z}_a = \mathbf{z}}, \quad (13c)$$

600 where  $w_{ij}$  is the  $ij$ -th entry in the transition matrix  $\mathbf{W}$ ,  $g_z$  is the breeding value for trait  $z$  in the actor,  $V_z$   
 601 is the additive genetic variance for trait  $z$ ,  $v_i$  is the individual reproductive value for class- $i$  individuals,  
 602  $u_j$  is the equilibrium frequency of class  $j$  individuals, and traits are evaluated at the population-average  
 603 value [i.e.,  $\mathbf{z}_a = (p_m, q_1, Q, y, Y) = \mathbf{z} = (p, q, q, y, y)$ ].

Equilibrium class frequencies  $u_i$  and individual reproductive values  $v_i$  can be respectively obtained from the equations

$$\lambda \mathbf{N} = \mathbf{W} \mathbf{N} \quad (14a)$$

$$\lambda \mathbf{N}^T = \mathbf{N}^T \mathbf{W}, \quad (14b)$$

where  $T$  denotes transposition and the equations are evaluated at the population averages. The equilibrium frequencies  $u_i$  are obtained by solving for  $N_i$  in eq. (14a) and dividing the solution by  $\sum N_i$ . The individual reproductive values  $v_i$  are obtained by solving for  $N_i$  in eq. (14b) together with the condition that the sum of class reproductive values is 1 (i.e.,  $\sum u_i v_i = 1$ , where  $u_i v_i$  is the reproductive value of class  $i$ ). The quantity  $\lambda$  is the dominant eigenvalue of the transition matrix  $\mathbf{W}$ , which gives the asymptotic growth rate of the population. These calculations yield the equilibrium class frequencies

$$u_m = \frac{\lambda}{\lambda + f_1 + f_2} \quad (15a)$$

$$u_1 = \frac{f_1}{\lambda + f_1 + f_2} \quad (15b)$$

$$u_2 = \frac{f_2}{\lambda + f_1 + f_2}, \quad (15c)$$

the individual reproductive values

$$v_m = \frac{\lambda + f_1 + f_2}{2\lambda} \quad (16a)$$

$$v_1 = \frac{s_1}{\lambda} v_m \quad (16b)$$

$$v_2 = \frac{s_2}{\lambda} v_m. \quad (16c)$$

and the asymptotic growth rate

$$\lambda = \sqrt{f_1 s_1 + f_2 s_2} \quad (17a)$$

$$= \sqrt{\eta \sigma n \{s_0 + p(1 - q) [(1 - \alpha)b - \alpha c]\}}. \quad (17b)$$

604 Because the available resources for offspring production only allow the mother to produce a number  
605 of offspring that maintains the population size constant, the number of offspring is

$$n = \frac{1}{\eta \sigma \{s_0 + p(1 - q) [(1 - \alpha)b - \alpha c]\}}, \quad (18)$$

606 in which case the asymptotic growth rate is  $\lambda = 1$ . Since competition is global, the number of offspring  
607  $n$  depends on the population-average trait values  $p$ ,  $q$ , and  $y$  rather than on local average trait values.



608 Hence, because the breeding values of actors are uncorrelated with population averages, the derivatives  
609 of fertility in line (13c) are zero.

Therefore, the dynamic equations specified by eq. (13) are

$$\frac{dp}{dt} = V_p v_m u_m \sigma (1 - q) (br_{2m} - cr_{1m}) \quad (19a)$$

$$\frac{dq}{dt} = -V_q v_m u_1 \sigma p (br_{21} - c) \quad (19b)$$

$$\frac{dy}{dt} = V_y v_m u_1 \sigma p (1 - q) [b_{\max} r_{21} - (c_{\text{eff}} - c_{\text{ineff}})], \quad (19c)$$

610 where  $r_{ji} = \rho_{ji} u_j / u_i$ . The quantity  $\rho_{ji} = dg_{z_j} / dg_{z_i}$  is the regression relatedness of an actor in class  $i$   
611 toward a recipient in class  $j$ , where  $g_{z_j}$  is the breeding value for  $z$  in the recipient and  $g_{z_i}$  is that in the  
612 actor. Hence,  $r_{ji}$  is an equilibrium relatedness.

613 **Figure legends**

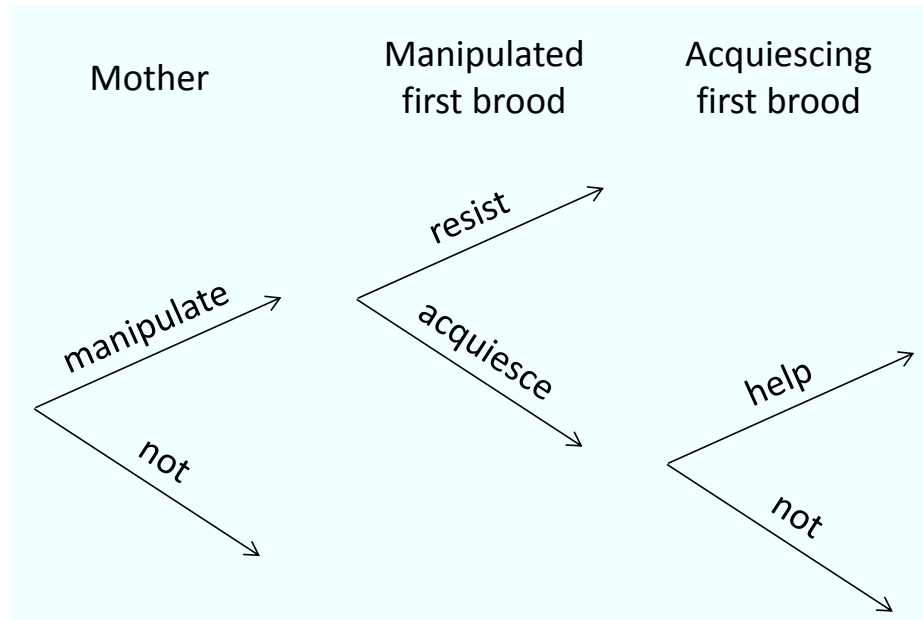

Figure 1: The three decisions individuals can make. Mothers manipulate with probability  $p$  first-brood offspring to stay as adults. Manipulated first-brood offspring resist with probability  $q$  and leave without delay. Otherwise, they acquiesce with probability  $1 - q$  and stay for some period. Acquiescing individuals help with probability  $y$  to raise the second brood.

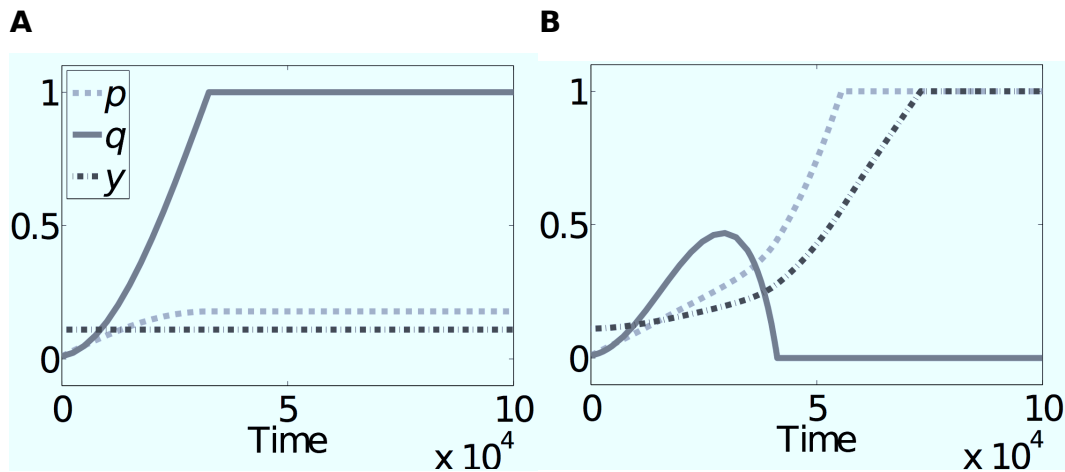

Figure 2: Coevolution of manipulation  $p$ , resistance  $q$ , and helping efficiency  $y$ . Numerical solutions of eqs. (19) are shown. (A) There is no genetic variation for helping efficiency ( $V_y = 0$ ). Resistance evolves and eliminates the manipulated behavior (i.e., the probability that first-brood offspring stay in the maternal patch is  $p^*(1 - q^*) = 0$  at the end). (B) Same conditions as in (A), but there is genetic variation for helping efficiency ( $V_y = 0.001$ ). Helping efficiency increases and after  $\approx 30 \times 10^3$  generations, resistance decreases and is eliminated. The remaining parameter values for both panels are

$p_0 = q_0 = 0.01$ ,  $y_0 = 0.11$ ,  $\rho = \rho_{1m} = \rho_{2m} = 1/2$ ,  $V_p = 0.001$ ,  $V_q = 0.1$ ,  $\alpha = \sigma = \eta = s_0 = 1/2$ ,  $c_{\text{eff}} = 0.2$ , and  $c_{\text{ineff}} = 0.012$ .

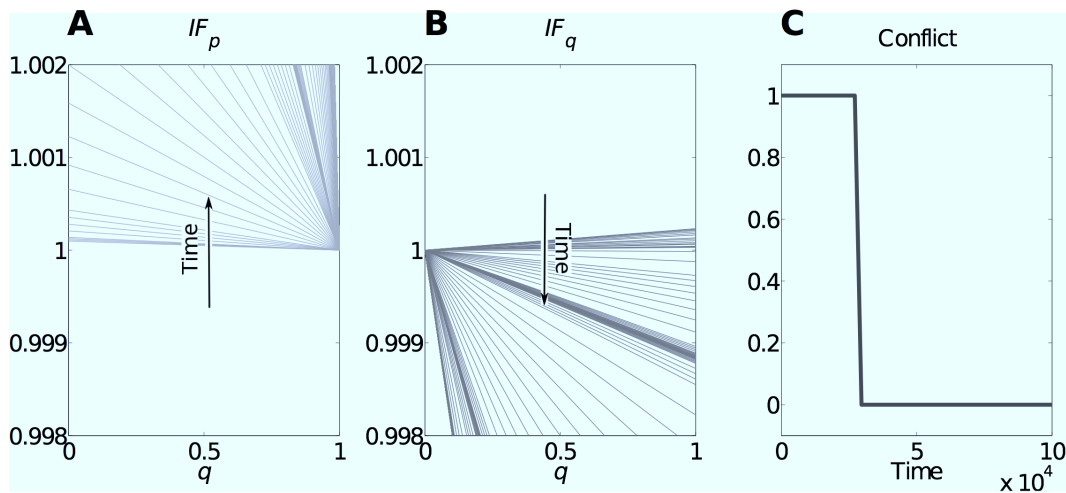

Figure 3: Evolutionary resolution of manipulation conflict. (A) Mother's inclusive fitness through manipulation  $IF_p$  vs. possible values of resistance  $q$  during the process in Fig. 2B. The lowest line is mother's inclusive fitness at time 1 in Fig. 2B, and the lines further up correspond to mother's inclusive fitness as time increases. (B) First-brood offspring's inclusive fitness through resistance  $IF_q$  vs. possible values of resistance during the process in Fig. 2B. The highest line is offspring's inclusive fitness at time 1 in Fig. 2B, and the lines further down correspond to offspring's inclusive fitness as time increases. In (A), the optimum inclusive fitness for the mother is at  $q = 0$  throughout, while in (B) the optimum inclusive fitness for first-brood offspring is initially at  $q = 1$  and later at  $q = 0$ . (C) The level of conflict over time. The level of conflict is the distance between the preferred trait values of the two parties. After  $\approx 30 \times 10^3$  generations, the conflict disappears. For the three panels, the same parameter values are used as in Fig. 2B. The inclusive fitness through trait  $i$  ( $= p, q$ ) is  $IF_i = IF_0 + i h_i$ , where the baseline inclusive fitness ( $IF_0$ ) is set to 1, and the inclusive fitness effect of trait  $i$  ( $h_i$ ) is given by the right-hand side of eqs. (19a) or (19b) divided by  $V_i$  respectively. The level of conflict is  $C = |\max_q(IF_p) - \max_q(IF_q)|$ , where  $\max_q(x)$  gives the resistance  $q$  that maximizes  $x$ .

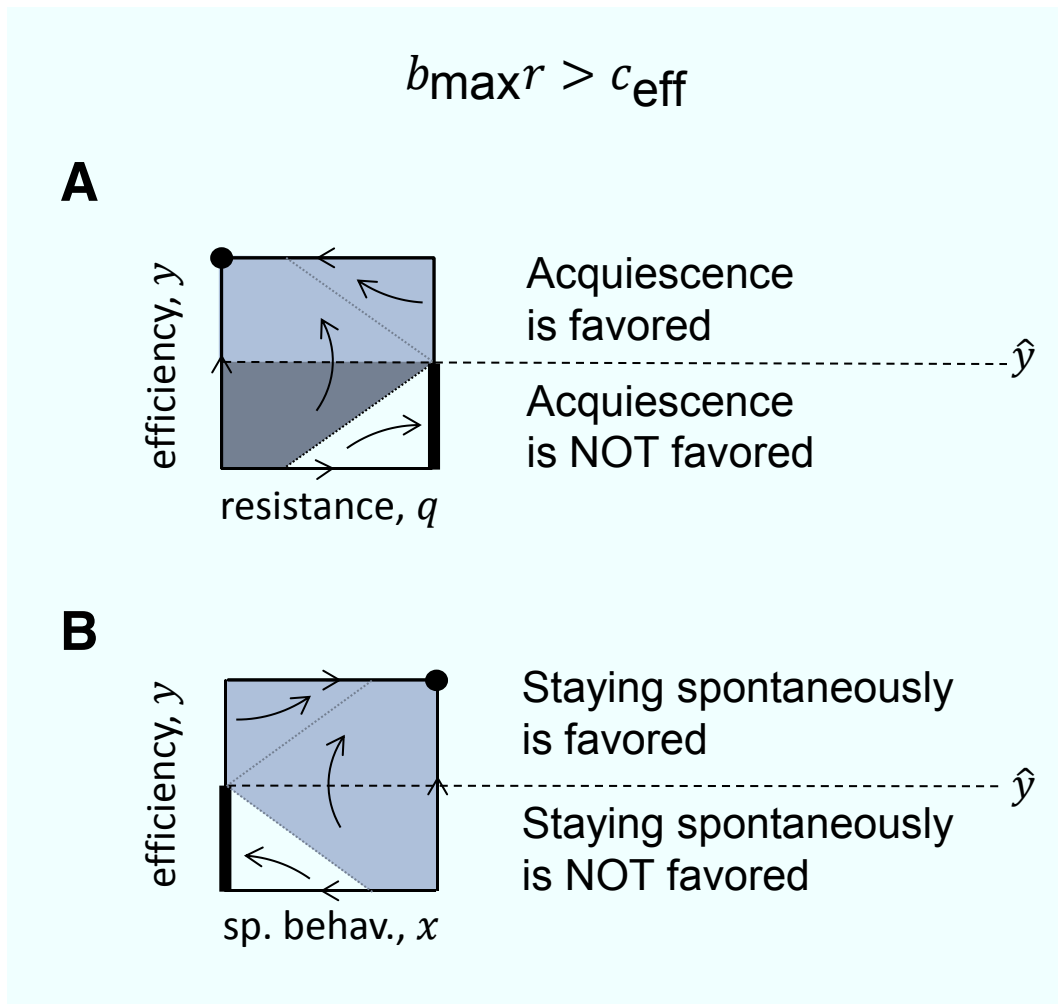

Figure 4: Coevolutionary dynamics of resistance  $q$  and spontaneous behavior  $x$  with helping efficiency  $y$  when  $b_{\max}r > c_{\text{eff}}$ . The arrows indicate the direction of change (the arrows at the boundaries indicate the partial change with respect to the direction of the boundary). Thick strokes indicate stable equilibria. (A) Coevolution of resistance  $q$  and helping efficiency  $y$ . Acquiescence is disfavored below the dashed line and is favored above it. The dashed line is the critical helping efficiency  $\hat{y} = c_{\text{ineff}}/S$  (obtained from ineq. (4b)). If the population starts in the gray areas, it converges to acquiescence and maximum helping efficiency (large dot). Thus, for final acquiescence, acquiescence need not be favored initially if the probability of resistance is initially sufficiently small (i.e., if the population starts in the dark gray area). (B) Coevolution of spontaneous behavior  $x$  and helping efficiency  $y$ . If the population starts in the gray area, it converges to spontaneous behavior and maximum helping efficiency (large dot).

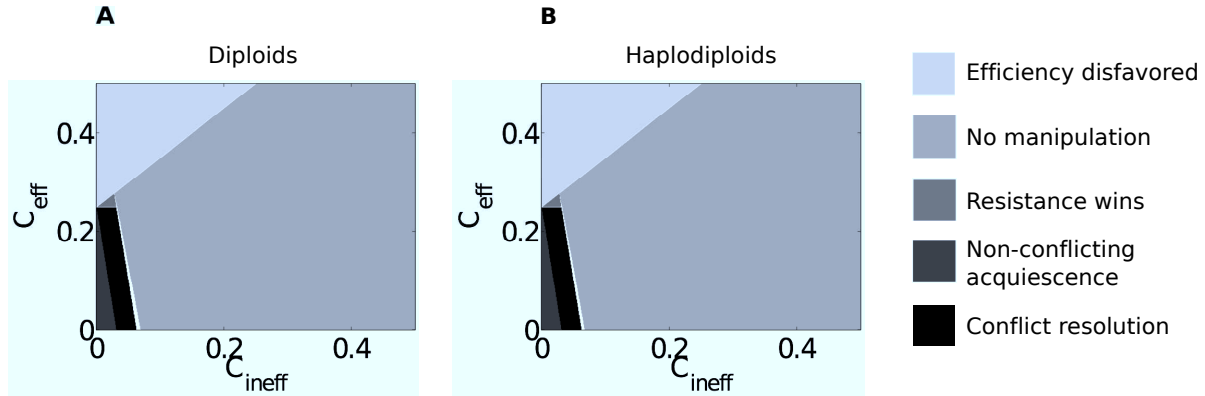

Figure 5: Conflict resolution across values of efficiency and inefficiency costs. (A) Diploids. (B) Haplodiploids. For both panels, in the lightest gray area, helping efficiency is disfavored. For the other shades, helping efficiency is favored. In addition, for light gray: manipulation does not evolve; for gray: manipulation evolves, but resistance wins; for dark gray: manipulation evolves but acquiescence is favored from the start and it is established at the end; and for black: manipulation and resistance evolve, but resistance is eliminated by the evolution of helping efficiency. Specifically, each region satisfies the following. For the lightest gray,  $y(0) > y(1)$ ; for the other shades  $y(0) < y(1)$ . In addition, light gray:  $p(0) > p(1)$ , and  $p(\text{end}) < 0.1$ ; gray:  $p(0) < p(1)$ ,  $q(0) < q(1)$ , and  $q(\text{end}) > 0.9$ ; dark gray:  $p(0) < p(1)$ ,  $q(0) > q(1)$ , and  $q(\text{end}) < 0.1$ ; and black:  $p(0) < p(1)$ ,  $q(0) < q(1)$ ,  $y(0) < y(1)$ ,  $p(\text{end}) > 0.9$ ,  $y(\text{end}) > 0.9$ , and  $q(\text{end}) < 0.1$ . White areas do not satisfy any of these conditions. The end is at  $10^6$  generations. Parameter values are as in Fig. 2 except that  $V_p, V_q, V_y = 0.01$  and in (B)  $\eta_{\text{♀}} = 1/2$ ,  $\eta_{\text{♂}} = 1$ ,  $\eta = \sigma\eta_{\text{♀}} + (1 - \sigma)\eta_{\text{♂}} = 3/4$ ,  $\rho = \sigma[\sigma 3/4 + (1 - \sigma)1/2] + (1 - \sigma)[\sigma/4 + (1 - \sigma)/2] = 1/2$ , and  $\rho_{1m} = \rho_{2m} = \sigma/2 + (1 - \sigma) = 3/4$  (regression relatedness values are taken from Bulmer (1994)).

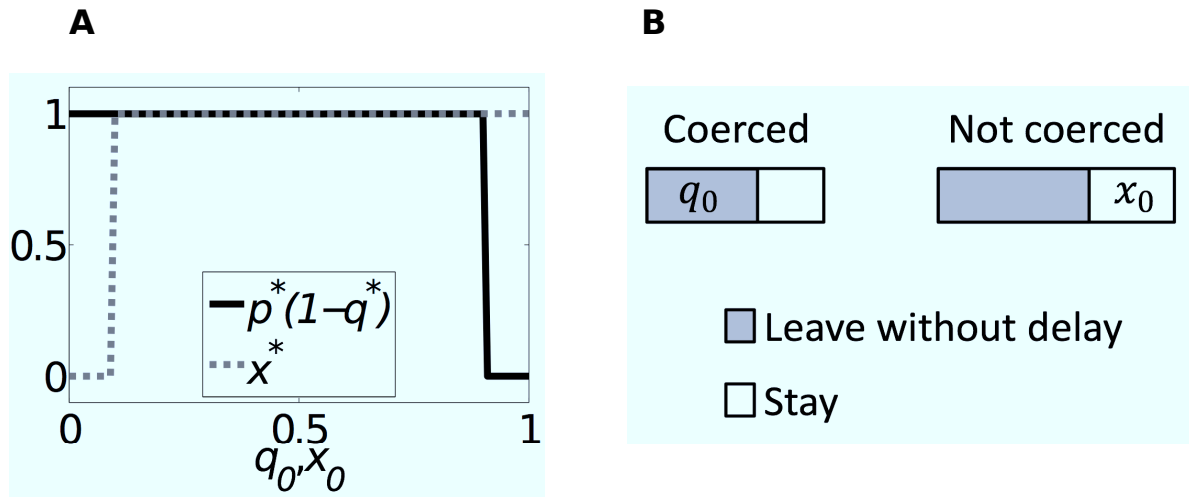

Figure 6: Discerning between manipulation and spontaneous helping. (A) Equilibrium values for induced and spontaneous behavior. The black line shows the predicted fraction of first brood that stay under manipulation vs. the ancestral resistance probability ( $q_0$ ). The dashed gray line shows the predicted fraction of first brood that stay under spontaneous behavior vs. the ancestral probability of staying spontaneously ( $x_0$ ). For advanced eusociality from manipulation, the ancestral resistance probability ( $q_0$ ) must be small enough. In contrast, for advanced eusociality from spontaneous behavior and the same ecological conditions, the ancestral probability of staying spontaneously ( $x_0$ ) must be large enough. Parameter values are as in Fig. 2 except that  $V_p, V_q, V_x, V_y = 0.01$ ,  $c_{\text{eff}} = 0.06$ , and  $c_{\text{ineff}} = 0.05$ . (B) Estimation of the ancestral probabilities of resistance ( $q_0$ ) and of staying spontaneously ( $x_0$ ). A fraction of the first-brood individuals in the ancestral population is maternally coerced. The ancestral probability of resistance ( $q_0$ ) is given by the fraction of coerced first brood that leave without delay. The ancestral probability of staying spontaneously ( $x_0$ ) is given by the fraction of non-coerced first brood that stay in the maternal patch for a sufficiently large portion of their adulthood so that their reproductive success is decreased.
